# Supplementary material for: Telomerase reverse transcriptase acts in a feedback loop with NF-κB pathway to regulate macrophage polarization in alcoholic liver disease
Source: PubMed Central journal article supplement (PMC4698632; doi:10.1038/srep18685), 2016-01-04

## Supplementary information

### Telomerase reverse transcriptase acts in a feedback loop with NF- $\kappa$ B pathway to regulate macrophage polarization in alcoholic liver disease

Xiao-qin Wu, Yang Yang, Wan-xia Li, Ya-hui Cheng, Xiao-feng Li, Cheng Huang,

Xiao-ming Meng, Bao-ming Wu, Xin-hua Liu, Lei Zhang, Xiong-wen Lv & Jun Li\*

**Table S1. Nucleotide sequence of primers used for real time-PCR.**

| Gene          | Accession no.  | Forward                      | Reverse                      |
|---------------|----------------|------------------------------|------------------------------|
| TERT          | NM_009354.1    | 5'-GGCTCTTCTTCTACCGTAAG-3'   | 5'-TGATGCCTGACCTCCTCTTG-3'   |
| TNF- $\alpha$ | NM_001278601.1 | 5'-CACCACCATCAAGGACTCAA-3'   | 5'-AGGCAACCTGACCACTCTCC-3'   |
| IL-1 $\beta$  | NM_008361.3    | 5'-CTTTGAAGTTGACGGACCC-3'    | 5'-TGAGTGATACTGCCTGCCTG-3'   |
| NOS2          | NM_010927.3    | 5'-AATCTTGGAGCGAGTTGTGG-3'   | 5'-CAGGAAGTAGGTGAGGGCTTG-3'  |
| CCL2          | NM_011333.3    | 5'-GGGCCTGCTGTTACAGTT-3'     | 5'-CCAGCCTACTCATTGGGAT-3'    |
| Arg-1         | NM_007482.3    | 5'-CTCCAAGCCAAAGTCCTTAGAG-3' | 5'-AGGAGCTGTCATTAGGGACATC-3' |
| Mrc2          | NM_008626.3    | 5'-TGCAAGCAATGCATCCAAGCCT-3' | 5'-ACGGCTTTCCGTGTGAGTTT-3'   |
| IL-10         | NM_010548.2    | 5'-GCCTTGCAGAAAAGAGAGCT-3'   | 5'-AAAGAAAGTCTTCACCTGGC-3'   |
| CD163         | NM_001170395.1 | 5'-TGGGTGGGGAAAGCATAACT-3'   | 5'-AAGTTGTCGTCACACACCGT-3'   |
| GAPDH         | NM_001289726.1 | 5'-GGACCTCATGGCCTACATGG-3'   | 5'-TAGGGCCTCTCTTGCTCAGT-3'   |

## Supplementary figure legends

**Figure S1. Effect of TERT over-expression on murine M2 macrophage polarization.** GV144-TERT was transiently transfected into RAW264.7 cells without and with IL-4 stimulation. (a) TERT successful over-expression was verified by real-time PCR and western blot in IL-4-stimulated RAW 264.7 cells. The results are shown as relative expression against control expression without treatment. (b) The mRNA levels of M2 macrophages biomarkers including Arg-1, IL-10, Mrc2 and CD163 were detected by real-time PCR. The results are shown as relative expression against control expression without treatment. (c) The secretion of proinflammatory cytokine IL-10 was determined by ELISA. Data shown are the mean  $\pm$  SD from 3 independent experiments. \* $P < 0.05$ , \*\* $P < 0.01$  vs control group. # $P < 0.05$ , ## $P < 0.01$  vs IL-4-treated group.

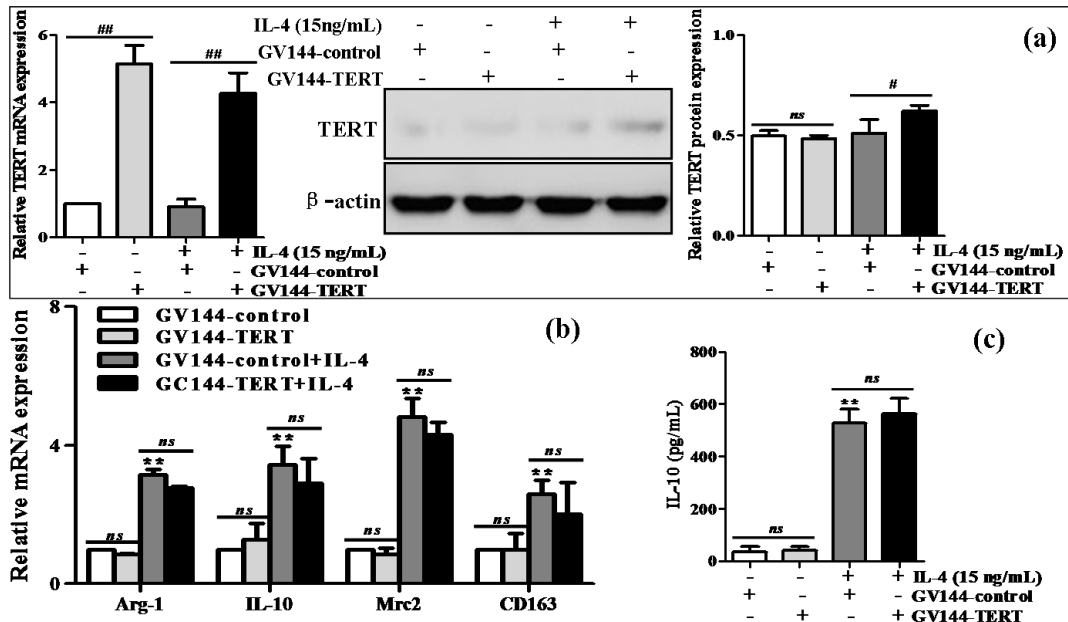

Supplement: srep18685-s1.pdf [file srep18685-s1.pdf]
